# Supplementary material
Source: Research Square preprint supplement (doi:10.21203/rs.3.rs-9523007/v1)
Supplement: Supplementary file 1 [file ce61e66ea38235fd15242a69.xlsx]

## Sheet: S2
Pattern	MDR_Flag	Clinical	Healthy_Individual	Surface_water
AMC-CXM-CTX-CAZ-FEP-GEN-CIP-SXT	MDR	AMC-CXM-CTX-CAZ-FEP-GEN-CIP-SXT (2 isolates, 5.4%, MDR)
AMC-CXM-CTX-CAZ-FEP-SXT	Non-MDR	AMC-CXM-CTX-CAZ-FEP-SXT (1 isolates, 2.7%, Non-MDR)
AMC-TZP-CXM-CTX-CAZ-FEP-CIP-SXT	MDR	AMC-TZP-CXM-CTX-CAZ-FEP-CIP-SXT (1 isolates, 2.7%, MDR)	AMC-TZP-CXM-CTX-CAZ-FEP-CIP-SXT (3 isolates, 4.1%, MDR)
AMC-TZP-CXM-CTX-CAZ-FEP-GEN-CIP	MDR	AMC-TZP-CXM-CTX-CAZ-FEP-GEN-CIP (1 isolates, 2.7%, MDR)
AMC-TZP-CXM-CTX-CAZ-FEP-GEN-CIP-SXT	MDR	AMC-TZP-CXM-CTX-CAZ-FEP-GEN-CIP-SXT (11 isolates, 29.7%, MDR)	AMC-TZP-CXM-CTX-CAZ-FEP-GEN-CIP-SXT (2 isolates, 2.7%, MDR)
AMC-TZP-CXM-CTX-CAZ-FEP-SXT	Non-MDR	AMC-TZP-CXM-CTX-CAZ-FEP-SXT (1 isolates, 2.7%, Non-MDR)	AMC-TZP-CXM-CTX-CAZ-FEP-SXT (8 isolates, 10.8%, Non-MDR)	AMC-TZP-CXM-CTX-CAZ-FEP-SXT (2 isolates, 3.3%, Non-MDR)
CXM-CTX-CAZ-FEP-GEN-CIP-SXT	MDR	CXM-CTX-CAZ-FEP-GEN-CIP-SXT (1 isolates, 2.7%, MDR)
CXM-CTX-CAZ-FEP-GEN-SXT	MDR	CXM-CTX-CAZ-FEP-GEN-SXT (14 isolates, 37.8%, MDR)
CXM-CTX-CAZ-GEN-CIP-SXT	MDR	CXM-CTX-CAZ-GEN-CIP-SXT (1 isolates, 2.7%, MDR)
TZP-CXM-CTX-CAZ-FEP-CIP-SXT-TGC	MDR	TZP-CXM-CTX-CAZ-FEP-CIP-SXT-TGC (1 isolates, 2.7%, MDR)
TZP-CXM-CTX-CAZ-FEP-GEN-CIP-SXT	MDR	TZP-CXM-CTX-CAZ-FEP-GEN-CIP-SXT (3 isolates, 8.1%, MDR)
AMC-SXT	Non-MDR		AMC-SXT (1 isolates, 1.4%, Non-MDR)
AMC-TZP-CXM-CTX-CAZ-CIP	Non-MDR		AMC-TZP-CXM-CTX-CAZ-CIP (1 isolates, 1.4%, Non-MDR)
AMC-TZP-CXM-CTX-CAZ-FEP	Non-MDR		AMC-TZP-CXM-CTX-CAZ-FEP (17 isolates, 23.0%, Non-MDR)	AMC-TZP-CXM-CTX-CAZ-FEP (36 isolates, 60.0%, Non-MDR)
AMC-TZP-CXM-CTX-CAZ-FEP-CIP	Non-MDR		AMC-TZP-CXM-CTX-CAZ-FEP-CIP (2 isolates, 2.7%, Non-MDR)
AMC-TZP-CXM-CTX-CAZ-FEP-CIP-SXT-TGC	MDR		AMC-TZP-CXM-CTX-CAZ-FEP-CIP-SXT-TGC (2 isolates, 2.7%, MDR)
AMC-TZP-CXM-CTX-CAZ-FEP-ERT-TGC	Non-MDR		AMC-TZP-CXM-CTX-CAZ-FEP-ERT-TGC (1 isolates, 1.4%, Non-MDR)
AMC-TZP-CXM-CTX-CAZ-FEP-GEN-CIP-SXT-TGC	MDR		AMC-TZP-CXM-CTX-CAZ-FEP-GEN-CIP-SXT-TGC (3 isolates, 4.1%, MDR)	AMC-TZP-CXM-CTX-CAZ-FEP-GEN-CIP-SXT-TGC (6 isolates, 10.0%, MDR)
AMC-TZP-CXM-CTX-CAZ-FEP-GEN-ERT-CIP-SXT	MDR		AMC-TZP-CXM-CTX-CAZ-FEP-GEN-ERT-CIP-SXT (2 isolates, 2.7%, MDR)
AMC-TZP-CXM-CTX-CAZ-FEP-GEN-SXT	MDR		AMC-TZP-CXM-CTX-CAZ-FEP-GEN-SXT (9 isolates, 12.2%, MDR)	AMC-TZP-CXM-CTX-CAZ-FEP-GEN-SXT (5 isolates, 8.3%, MDR)
AMC-TZP-CXM-CTX-CAZ-FEP-GEN-SXT-TGC	MDR		AMC-TZP-CXM-CTX-CAZ-FEP-GEN-SXT-TGC (4 isolates, 5.4%, MDR)
AMC-TZP-CXM-CTX-CAZ-FEP-GEN-TGC	MDR		AMC-TZP-CXM-CTX-CAZ-FEP-GEN-TGC (1 isolates, 1.4%, MDR)	AMC-TZP-CXM-CTX-CAZ-FEP-GEN-TGC (1 isolates, 1.7%, MDR)
AMC-TZP-CXM-CTX-CAZ-FEP-SXT-TGC	MDR		AMC-TZP-CXM-CTX-CAZ-FEP-SXT-TGC (4 isolates, 5.4%, MDR)	AMC-TZP-CXM-CTX-CAZ-FEP-SXT-TGC (2 isolates, 3.3%, MDR)
AMC-TZP-CXM-CTX-CAZ-FEP-TGC	Non-MDR		AMC-TZP-CXM-CTX-CAZ-FEP-TGC (10 isolates, 13.5%, Non-MDR)
AMC-TZP-CXM-CTX-CAZ-TGC	Non-MDR		AMC-TZP-CXM-CTX-CAZ-TGC (3 isolates, 4.1%, Non-MDR)
CXM-CTX-FEP-CIP-SXT-TGC	MDR		CXM-CTX-FEP-CIP-SXT-TGC (1 isolates, 1.4%, MDR)
AMC-CXM-CTX-CAZ-FEP	Non-MDR			AMC-CXM-CTX-CAZ-FEP (1 isolates, 1.7%, Non-MDR)
AMC-CXM-CTX-CAZ-FEP-GEN-SXT	MDR			AMC-CXM-CTX-CAZ-FEP-GEN-SXT (1 isolates, 1.7%, MDR)
AMC-TZP-CTX-FEP	Non-MDR			AMC-TZP-CTX-FEP (3 isolates, 5.0%, Non-MDR)
AMC-TZP-CXM-CTX-CAZ-FEP-ERT-MEM	Non-MDR			AMC-TZP-CXM-CTX-CAZ-FEP-ERT-MEM (1 isolates, 1.7%, Non-MDR)
AMC-TZP-CXM-CTX-CAZ-FEP-GEN	Non-MDR			AMC-TZP-CXM-CTX-CAZ-FEP-GEN (2 isolates, 3.3%, Non-MDR)
		LIST OF ISOLATES , SOURCES AND PATTERNS
		Identification	Source	Pattern
		KpHI_1	Healthy_Individual	AMC-TZP-CXM-CTX-CAZ-FEP-SXT
		KpHI_2	Healthy_Individual	AMC-TZP-CXM-CTX-CAZ-FEP-SXT-TGC
		KpHI_3	Healthy_Individual	AMC-TZP-CXM-CTX-CAZ-FEP-SXT
		KpHI_4	Healthy_Individual	AMC-TZP-CXM-CTX-CAZ-FEP-TGC
		KpHI_5	Healthy_Individual	AMC-TZP-CXM-CTX-CAZ-TGC
		KpHI_6	Healthy_Individual	AMC-TZP-CXM-CTX-CAZ-FEP-GEN-SXT
		KpHI_7	Healthy_Individual	AMC-TZP-CXM-CTX-CAZ-FEP
		KpHI_8	Healthy_Individual	AMC-TZP-CXM-CTX-CAZ-FEP
		KpHI_9	Healthy_Individual	AMC-TZP-CXM-CTX-CAZ-FEP-ERT-TGC
		KpHI_10	Healthy_Individual	AMC-TZP-CXM-CTX-CAZ-FEP-SXT
		KpHI_11	Healthy_Individual	AMC-TZP-CXM-CTX-CAZ-FEP-SXT
		KpHI_12	Healthy_Individual	AMC-TZP-CXM-CTX-CAZ-FEP-SXT
		KpHI_13	Healthy_Individual	AMC-TZP-CXM-CTX-CAZ-FEP-SXT
		KpHI_14	Healthy_Individual	AMC-TZP-CXM-CTX-CAZ-FEP-GEN-SXT
		KpHI_15	Healthy_Individual	AMC-TZP-CXM-CTX-CAZ-FEP-CIP-SXT
		KpHI_16	Healthy_Individual	AMC-TZP-CXM-CTX-CAZ-FEP
		KpHI_17	Healthy_Individual	AMC-TZP-CXM-CTX-CAZ-FEP-CIP-SXT
		KpHI_18	Healthy_Individual	AMC-TZP-CXM-CTX-CAZ-FEP-GEN-CIP-SXT
		KpHI_19	Healthy_Individual	AMC-TZP-CXM-CTX-CAZ-FEP
		KpHI_20	Healthy_Individual	AMC-TZP-CXM-CTX-CAZ-FEP-GEN-SXT
		KpHI_21	Healthy_Individual	AMC-TZP-CXM-CTX-CAZ-FEP-CIP-SXT-TGC
		KpHI_22	Healthy_Individual	AMC-TZP-CXM-CTX-CAZ-FEP
		KpHI_23	Healthy_Individual	AMC-TZP-CXM-CTX-CAZ-FEP
		KpHI_24	Healthy_Individual	AMC-TZP-CXM-CTX-CAZ-FEP-TGC
		KpHI_25	Healthy_Individual	AMC-TZP-CXM-CTX-CAZ-FEP
		KpHI_26	Healthy_Individual	AMC-TZP-CXM-CTX-CAZ-FEP
		KpHI_27	Healthy_Individual	AMC-TZP-CXM-CTX-CAZ-FEP
		KpHI_28	Healthy_Individual	AMC-TZP-CXM-CTX-CAZ-FEP-TGC
		KpHI_29	Healthy_Individual	AMC-TZP-CXM-CTX-CAZ-FEP-GEN-SXT
		KpHI_30	Healthy_Individual	AMC-TZP-CXM-CTX-CAZ-FEP-GEN-ERT-CIP-SXT
		KpHI_31	Healthy_Individual	AMC-TZP-CXM-CTX-CAZ-FEP-GEN-SXT
		KpHI_32	Healthy_Individual	AMC-TZP-CXM-CTX-CAZ-FEP-GEN-ERT-CIP-SXT
		KpHI_33	Healthy_Individual	AMC-TZP-CXM-CTX-CAZ-FEP-TGC
		KpHI_34	Healthy_Individual	AMC-TZP-CXM-CTX-CAZ-FEP-SXT-TGC
		KpHI_35	Healthy_Individual	AMC-TZP-CXM-CTX-CAZ-CIP
		KpHI_36	Healthy_Individual	AMC-TZP-CXM-CTX-CAZ-FEP-TGC
		KpHI_37	Healthy_Individual	AMC-TZP-CXM-CTX-CAZ-FEP
		KpHI_38	Healthy_Individual	AMC-TZP-CXM-CTX-CAZ-FEP
		KpHI_39	Healthy_Individual	AMC-TZP-CXM-CTX-CAZ-FEP
		KpHI_40	Healthy_Individual	AMC-SXT
		KpHI_41	Healthy_Individual	AMC-TZP-CXM-CTX-CAZ-FEP-GEN-SXT
		KpHI_42	Healthy_Individual	AMC-TZP-CXM-CTX-CAZ-FEP-GEN-SXT-TGC
		KpHI_43	Healthy_Individual	AMC-TZP-CXM-CTX-CAZ-TGC
		KpHI_44	Healthy_Individual	AMC-TZP-CXM-CTX-CAZ-FEP-GEN-SXT
		KpHI_45	Healthy_Individual	AMC-TZP-CXM-CTX-CAZ-FEP-SXT-TGC
		KpHI_46	Healthy_Individual	AMC-TZP-CXM-CTX-CAZ-FEP-SXT
		KpHI_47	Healthy_Individual	AMC-TZP-CXM-CTX-CAZ-FEP-GEN-CIP-SXT-TGC
		KpHI_48	Healthy_Individual	AMC-TZP-CXM-CTX-CAZ-FEP-GEN-CIP-SXT
		KpHI_49	Healthy_Individual	AMC-TZP-CXM-CTX-CAZ-FEP
		KpHI_50	Healthy_Individual	AMC-TZP-CXM-CTX-CAZ-FEP-TGC
		KpHI_51	Healthy_Individual	AMC-TZP-CXM-CTX-CAZ-FEP-CIP
		KpHI_52	Healthy_Individual	AMC-TZP-CXM-CTX-CAZ-FEP
		KpHI_53	Healthy_Individual	AMC-TZP-CXM-CTX-CAZ-FEP-TGC
		KpHI_54	Healthy_Individual	AMC-TZP-CXM-CTX-CAZ-FEP
		KpHI_55	Healthy_Individual	AMC-TZP-CXM-CTX-CAZ-FEP-TGC
		KpHI_56	Healthy_Individual	AMC-TZP-CXM-CTX-CAZ-FEP-CIP-SXT
		KpHI_57	Healthy_Individual	AMC-TZP-CXM-CTX-CAZ-FEP-TGC
		KpHI_58	Healthy_Individual	AMC-TZP-CXM-CTX-CAZ-FEP-TGC
		KpHI_59	Healthy_Individual	AMC-TZP-CXM-CTX-CAZ-FEP-SXT-TGC
		KpHI_60	Healthy_Individual	AMC-TZP-CXM-CTX-CAZ-FEP
		KpHI_61	Healthy_Individual	AMC-TZP-CXM-CTX-CAZ-FEP-CIP-SXT-TGC
		KpHI_62	Healthy_Individual	AMC-TZP-CXM-CTX-CAZ-FEP-GEN-SXT-TGC
		KpHI_63	Healthy_Individual	AMC-TZP-CXM-CTX-CAZ-FEP-GEN-CIP-SXT-TGC
		KpHI_64	Healthy_Individual	AMC-TZP-CXM-CTX-CAZ-FEP-GEN-SXT-TGC
		KpHI_65	Healthy_Individual	AMC-TZP-CXM-CTX-CAZ-FEP-CIP
		KpHI_66	Healthy_Individual	AMC-TZP-CXM-CTX-CAZ-FEP-GEN-SXT
		KpHI_67	Healthy_Individual	AMC-TZP-CXM-CTX-CAZ-FEP-GEN-TGC
		KpHI_68	Healthy_Individual	CXM-CTX-FEP-CIP-SXT-TGC
		KpHI_69	Healthy_Individual	AMC-TZP-CXM-CTX-CAZ-FEP-GEN-SXT-TGC
		KpHI_70	Healthy_Individual	AMC-TZP-CXM-CTX-CAZ-FEP-GEN-CIP-SXT-TGC
		KpHI_71	Healthy_Individual	AMC-TZP-CXM-CTX-CAZ-FEP
		KpHI_72	Healthy_Individual	AMC-TZP-CXM-CTX-CAZ-TGC
		KpHI_73	Healthy_Individual	AMC-TZP-CXM-CTX-CAZ-FEP-GEN-SXT
		KpHI_74	Healthy_Individual	AMC-TZP-CXM-CTX-CAZ-FEP-SXT
		KpSW_1	Surface_water	AMC-TZP-CXM-CTX-CAZ-FEP-GEN-CIP-SXT-TGC
		KpSW_2	Surface_water	AMC-TZP-CXM-CTX-CAZ-FEP-GEN-CIP-SXT-TGC
		KpSW_3	Surface_water	AMC-TZP-CTX-FEP
		KpSW_4	Surface_water	AMC-TZP-CTX-FEP
		KpSW_5	Surface_water	AMC-TZP-CXM-CTX-CAZ-FEP
		KpSW_6	Surface_water	AMC-TZP-CXM-CTX-CAZ-FEP
		KpSW_7	Surface_water	AMC-TZP-CXM-CTX-CAZ-FEP
		KpSW_8	Surface_water	AMC-TZP-CTX-FEP
		KpSW_9	Surface_water	AMC-TZP-CXM-CTX-CAZ-FEP
		KpSW_10	Surface_water	AMC-CXM-CTX-CAZ-FEP
		KpSW_11	Surface_water	AMC-TZP-CXM-CTX-CAZ-FEP
		KpSW_12	Surface_water	AMC-TZP-CXM-CTX-CAZ-FEP
		KpSW_13	Surface_water	AMC-TZP-CXM-CTX-CAZ-FEP
		KpSW_14	Surface_water	AMC-TZP-CXM-CTX-CAZ-FEP
		KpSW_15	Surface_water	AMC-TZP-CXM-CTX-CAZ-FEP
		KpSW_16	Surface_water	AMC-TZP-CXM-CTX-CAZ-FEP
		KpSW_17	Surface_water	AMC-TZP-CXM-CTX-CAZ-FEP
		KpSW_18	Surface_water	AMC-TZP-CXM-CTX-CAZ-FEP
		KpSW_19	Surface_water	AMC-TZP-CXM-CTX-CAZ-FEP
		KpSW_20	Surface_water	AMC-TZP-CXM-CTX-CAZ-FEP
		KpSW_21	Surface_water	AMC-TZP-CXM-CTX-CAZ-FEP
		KpSW_22	Surface_water	AMC-TZP-CXM-CTX-CAZ-FEP-GEN
		KpSW_23	Surface_water	AMC-TZP-CXM-CTX-CAZ-FEP-ERT-MEM
		KpSW_24	Surface_water	AMC-TZP-CXM-CTX-CAZ-FEP-GEN-SXT
		KpSW_25	Surface_water	AMC-TZP-CXM-CTX-CAZ-FEP
		KpSW_26	Surface_water	AMC-TZP-CXM-CTX-CAZ-FEP-GEN-SXT
		KpSW_27	Surface_water	AMC-TZP-CXM-CTX-CAZ-FEP-GEN-SXT
		KpSW_28	Surface_water	AMC-TZP-CXM-CTX-CAZ-FEP-GEN-TGC
		KpSW_29	Surface_water	AMC-TZP-CXM-CTX-CAZ-FEP-SXT-TGC
		KpSW_30	Surface_water	AMC-TZP-CXM-CTX-CAZ-FEP-SXT-TGC
		KpSW_31	Surface_water	AMC-TZP-CXM-CTX-CAZ-FEP
		KpSW_32	Surface_water	AMC-TZP-CXM-CTX-CAZ-FEP
		KpSW_33	Surface_water	AMC-TZP-CXM-CTX-CAZ-FEP
		KpSW_34	Surface_water	AMC-TZP-CXM-CTX-CAZ-FEP
		KpSW_35	Surface_water	AMC-TZP-CXM-CTX-CAZ-FEP
		KpSW_36	Surface_water	AMC-TZP-CXM-CTX-CAZ-FEP
		KpSW_37	Surface_water	AMC-TZP-CXM-CTX-CAZ-FEP
		KpSW_38	Surface_water	AMC-TZP-CXM-CTX-CAZ-FEP
		KpSW_39	Surface_water	AMC-TZP-CXM-CTX-CAZ-FEP-GEN-CIP-SXT-TGC
		KpSW_40	Surface_water	AMC-TZP-CXM-CTX-CAZ-FEP-GEN-CIP-SXT-TGC
		KpSW_41	Surface_water	AMC-TZP-CXM-CTX-CAZ-FEP-GEN-CIP-SXT-TGC
		KpSW_42	Surface_water	AMC-TZP-CXM-CTX-CAZ-FEP-GEN-CIP-SXT-TGC
		KpSW_43	Surface_water	AMC-TZP-CXM-CTX-CAZ-FEP-GEN-SXT
		KpSW_44	Surface_water	AMC-CXM-CTX-CAZ-FEP-GEN-SXT
		KpSW_45	Surface_water	AMC-TZP-CXM-CTX-CAZ-FEP-GEN-SXT
		KpSW_46	Surface_water	AMC-TZP-CXM-CTX-CAZ-FEP-GEN
		KpSW_47	Surface_water	AMC-TZP-CXM-CTX-CAZ-FEP
		KpSW_48	Surface_water	AMC-TZP-CXM-CTX-CAZ-FEP
		KpSW_49	Surface_water	AMC-TZP-CXM-CTX-CAZ-FEP
		KpSW_50	Surface_water	AMC-TZP-CXM-CTX-CAZ-FEP
		KpSW_51	Surface_water	AMC-TZP-CXM-CTX-CAZ-FEP
		KpSW_52	Surface_water	AMC-TZP-CXM-CTX-CAZ-FEP
		KpSW_53	Surface_water	AMC-TZP-CXM-CTX-CAZ-FEP
		KpSW_54	Surface_water	AMC-TZP-CXM-CTX-CAZ-FEP
		KpSW_55	Surface_water	AMC-TZP-CXM-CTX-CAZ-FEP
		KpSW_56	Surface_water	AMC-TZP-CXM-CTX-CAZ-FEP
		KpSW_57	Surface_water	AMC-TZP-CXM-CTX-CAZ-FEP
		KpSW_58	Surface_water	AMC-TZP-CXM-CTX-CAZ-FEP
		KpSW_59	Surface_water	AMC-TZP-CXM-CTX-CAZ-FEP-SXT
		KpSW_60	Surface_water	AMC-TZP-CXM-CTX-CAZ-FEP-SXT
		CMKP1	Clinical	AMC-TZP-CXM-CTX-CAZ-FEP-GEN-CIP-SXT
		CMKP2	Clinical	CXM-CTX-CAZ-FEP-GEN-SXT
		CMKP3	Clinical	AMC-TZP-CXM-CTX-CAZ-FEP-GEN-CIP-SXT
		CMKP4	Clinical	CXM-CTX-CAZ-FEP-GEN-SXT
		CMKP5	Clinical	AMC-TZP-CXM-CTX-CAZ-FEP-GEN-CIP-SXT
		CMKP6	Clinical	TZP-CXM-CTX-CAZ-FEP-GEN-CIP-SXT
		CJKP1	Clinical	AMC-TZP-CXM-CTX-CAZ-FEP-SXT
		CJKP2	Clinical	AMC-CXM-CTX-CAZ-FEP-GEN-CIP-SXT
		CJKP3	Clinical	AMC-TZP-CXM-CTX-CAZ-FEP-GEN-CIP-SXT
		CJKP4	Clinical	TZP-CXM-CTX-CAZ-FEP-GEN-CIP-SXT
		CJKP5	Clinical	TZP-CXM-CTX-CAZ-FEP-GEN-CIP-SXT
		CJKP6	Clinical	CXM-CTX-CAZ-FEP-GEN-SXT
		CYKP1	Clinical	CXM-CTX-CAZ-FEP-GEN-SXT
		CYKP2	Clinical	CXM-CTX-CAZ-FEP-GEN-SXT
		CYKP3	Clinical	CXM-CTX-CAZ-FEP-GEN-SXT
		CYKP4	Clinical	CXM-CTX-CAZ-FEP-GEN-SXT
		CYKP5	Clinical	AMC-TZP-CXM-CTX-CAZ-FEP-GEN-CIP-SXT
		CYKP6	Clinical	AMC-TZP-CXM-CTX-CAZ-FEP-GEN-CIP-SXT
		CAKP1	Clinical	CXM-CTX-CAZ-FEP-GEN-SXT
		CAKP2	Clinical	AMC-TZP-CXM-CTX-CAZ-FEP-GEN-CIP-SXT
		CAKP3	Clinical	AMC-TZP-CXM-CTX-CAZ-FEP-GEN-CIP-SXT
		CAKP4	Clinical	CXM-CTX-CAZ-FEP-GEN-SXT
		CSKP1	Clinical	AMC-TZP-CXM-CTX-CAZ-FEP-CIP-SXT
		CSKP2	Clinical	AMC-TZP-CXM-CTX-CAZ-FEP-GEN-CIP-SXT
		CSKP3	Clinical	AMC-TZP-CXM-CTX-CAZ-FEP-GEN-CIP-SXT
		CSKP4	Clinical	CXM-CTX-CAZ-FEP-GEN-SXT
		CSKP5	Clinical	CXM-CTX-CAZ-FEP-GEN-SXT
		COKP1	Clinical	CXM-CTX-CAZ-FEP-GEN-SXT
		COKP2	Clinical	TZP-CXM-CTX-CAZ-FEP-CIP-SXT-TGC
		COKP3	Clinical	CXM-CTX-CAZ-FEP-GEN-CIP-SXT
		CNKP1	Clinical	AMC-TZP-CXM-CTX-CAZ-FEP-GEN-CIP
		CNKP2	Clinical	AMC-CXM-CTX-CAZ-FEP-SXT
		CNKP3	Clinical	AMC-CXM-CTX-CAZ-FEP-GEN-CIP-SXT
		CNKP4	Clinical	CXM-CTX-CAZ-GEN-CIP-SXT
		CNKP5	Clinical	CXM-CTX-CAZ-FEP-GEN-SXT
		CDKP1	Clinical	AMC-TZP-CXM-CTX-CAZ-FEP-GEN-CIP-SXT
		CDKP2	Clinical	CXM-CTX-CAZ-FEP-GEN-SXT

## Sheet: S3
Source	MDR_Status	Number_of_Patterns	Total_Isolates	Shannon_Index	Hill_D1	Shannon_CI_Lower	Shannon_CI_Upper	Shannon_95CI	Evenness_J
Clinical	Overall	11	37	1.7729	5.8880	1.2356	1.9453	1.7729 (1.2356 - 1.9453)	0.7394
Clinical	Non-MDR	2	2	0.6931	2.0000	-0.0000	0.6931	0.6931 (-0.0000 - 0.6931)	1.0000
Clinical	MDR	9	35	1.6123	5.0145	1.1236	1.8102	1.6123 (1.1236 - 1.8102)	0.7338
Healthy_Individual	Overall	18	74	2.4916	12.0803	2.1367	2.5675	2.4916 (2.1367 - 2.5675)	0.8620
Healthy_Individual	Non-MDR	8	43	1.6098	5.0021	1.2346	1.7477	1.6098 (1.2346 - 1.7477)	0.7742
Healthy_Individual	MDR	10	31	2.0915	8.0974	1.6066	2.1646	2.0915 (1.6066 - 2.1646)	0.9083
Surface_water	Overall	11	60	1.5067	4.5118	1.0752	1.7334	1.5067 (1.0752 - 1.7334)	0.6283
Surface_water	Non-MDR	6	45	0.8050	2.2367	0.3924	1.0777	0.8050 (0.3924 - 1.0777)	0.4493
Surface_water	MDR	5	15	1.3624	3.9057	0.7299	1.5066	1.3624 (0.7299 - 1.5066)	0.8465

## Sheet: S4
Table S4/A - MDR Prevalence
Source	MDR_Status	Number_of_Isolates	Total_Source_Isolates	Prevalence	Patterns_Included
Clinical	Non-MDR	2	37	5.40541	AMC-CXM-CTX-CAZ-FEP-SXT | AMC-TZP-CXM-CTX-CAZ-FEP-SXT
Clinical	MDR	35	37	94.5946	AMC-CXM-CTX-CAZ-FEP-GEN-CIP-SXT | AMC-TZP-CXM-CTX-CAZ-FEP-CIP-SXT | AMC-TZP-CXM-CTX-CAZ-FEP-GEN-CIP | AMC-TZP-CXM-CTX-CAZ-FEP-GEN-CIP-SXT | CXM-CTX-CAZ-FEP-GEN-CIP-SXT | CXM-CTX-CAZ-FEP-GEN-SXT | CXM-CTX-CAZ-GEN-CIP-SXT | TZP-CXM-CTX-CAZ-FEP-CIP-SXT-TGC | TZP-CXM-CTX-CAZ-FEP-GEN-CIP-SXT
Healthy_Individual	Non-MDR	43	74	58.1081	AMC-SXT | AMC-TZP-CXM-CTX-CAZ-CIP | AMC-TZP-CXM-CTX-CAZ-FEP | AMC-TZP-CXM-CTX-CAZ-FEP-CIP | AMC-TZP-CXM-CTX-CAZ-FEP-ERT-TGC | AMC-TZP-CXM-CTX-CAZ-FEP-SXT | AMC-TZP-CXM-CTX-CAZ-FEP-TGC | AMC-TZP-CXM-CTX-CAZ-TGC
Healthy_Individual	MDR	31	74	41.8919	AMC-TZP-CXM-CTX-CAZ-FEP-CIP-SXT | AMC-TZP-CXM-CTX-CAZ-FEP-CIP-SXT-TGC | AMC-TZP-CXM-CTX-CAZ-FEP-GEN-CIP-SXT | AMC-TZP-CXM-CTX-CAZ-FEP-GEN-CIP-SXT-TGC | AMC-TZP-CXM-CTX-CAZ-FEP-GEN-ERT-CIP-SXT | AMC-TZP-CXM-CTX-CAZ-FEP-GEN-SXT | AMC-TZP-CXM-CTX-CAZ-FEP-GEN-SXT-TGC | AMC-TZP-CXM-CTX-CAZ-FEP-GEN-TGC | AMC-TZP-CXM-CTX-CAZ-FEP-SXT-TGC | CXM-CTX-FEP-CIP-SXT-TGC
Surface_water	Non-MDR	45	60	75	AMC-CXM-CTX-CAZ-FEP | AMC-TZP-CTX-FEP | AMC-TZP-CXM-CTX-CAZ-FEP | AMC-TZP-CXM-CTX-CAZ-FEP-ERT-MEM | AMC-TZP-CXM-CTX-CAZ-FEP-GEN | AMC-TZP-CXM-CTX-CAZ-FEP-SXT
Surface_water	MDR	15	60	25	AMC-CXM-CTX-CAZ-FEP-GEN-SXT | AMC-TZP-CXM-CTX-CAZ-FEP-GEN-CIP-SXT-TGC | AMC-TZP-CXM-CTX-CAZ-FEP-GEN-SXT | AMC-TZP-CXM-CTX-CAZ-FEP-GEN-TGC | AMC-TZP-CXM-CTX-CAZ-FEP-SXT-TGC
Table S4/B - MDR Chi-Square Test of Independence
Test	Chi_Square_Statistic	Degrees_of_Freedom	P_Value	Significance	Interpretation
Chi-Square Test of Independence	46.0322	2	1.00979e-10	Significant	MDR prevalence differs significantly across sources
MDR - Pairwie Comparison	Source1	Chi_Square	P_Value	Significant	Interpretation
Clinical vs Healthy_Individual	Clinical	26.278	0.0000	Yes	Clinical has higher MDR prevalence
Clinical vs Surface_water	Clinical	41.639	0.0000	Yes	Clinical has higher MDR prevalence
Healthy_Individual vs Surface_water	Healthy_Individual	3.478	0.0622	No	No significant difference
Table S4/C - Venn Analysis
MDR_Status	Region	Count	Patterns
MDR	All three sources	0
MDR	Clinical and Healthy_Individual only	2	AMC-TZP-CXM-CTX-CAZ-FEP-CIP-SXT | AMC-TZP-CXM-CTX-CAZ-FEP-GEN-CIP-SXT
MDR	Clinical and Surface_water only	0
MDR	Healthy_Individual and Surface_water only	4	AMC-TZP-CXM-CTX-CAZ-FEP-GEN-CIP-SXT-TGC | AMC-TZP-CXM-CTX-CAZ-FEP-GEN-SXT | AMC-TZP-CXM-CTX-CAZ-FEP-GEN-TGC | AMC-TZP-CXM-CTX-CAZ-FEP-SXT-TGC
MDR	Clinical only	7	AMC-CXM-CTX-CAZ-FEP-GEN-CIP-SXT | AMC-TZP-CXM-CTX-CAZ-FEP-GEN-CIP | CXM-CTX-CAZ-FEP-GEN-CIP-SXT | CXM-CTX-CAZ-FEP-GEN-SXT | CXM-CTX-CAZ-GEN-CIP-SXT | TZP-CXM-CTX-CAZ-FEP-CIP-SXT-TGC | TZP-CXM-CTX-CAZ-FEP-GEN-CIP-SXT
MDR	Healthy_Individual only	4	AMC-TZP-CXM-CTX-CAZ-FEP-CIP-SXT-TGC | AMC-TZP-CXM-CTX-CAZ-FEP-GEN-ERT-CIP-SXT | AMC-TZP-CXM-CTX-CAZ-FEP-GEN-SXT-TGC | CXM-CTX-FEP-CIP-SXT-TGC
MDR	Surface_water only	1	AMC-CXM-CTX-CAZ-FEP-GEN-SXT
Non-MDR	All three sources	1	AMC-TZP-CXM-CTX-CAZ-FEP-SXT
Non-MDR	Clinical and Healthy_Individual only	0
Non-MDR	Clinical and Surface_water only	0
Non-MDR	Healthy_Individual and Surface_water only	1	AMC-TZP-CXM-CTX-CAZ-FEP
Non-MDR	Clinical only	1	AMC-CXM-CTX-CAZ-FEP-SXT
Non-MDR	Healthy_Individual only	6	AMC-SXT | AMC-TZP-CXM-CTX-CAZ-CIP | AMC-TZP-CXM-CTX-CAZ-FEP-CIP | AMC-TZP-CXM-CTX-CAZ-FEP-ERT-TGC | AMC-TZP-CXM-CTX-CAZ-FEP-TGC | AMC-TZP-CXM-CTX-CAZ-TGC
Non-MDR	Surface_water only	4	AMC-CXM-CTX-CAZ-FEP | AMC-TZP-CTX-FEP | AMC-TZP-CXM-CTX-CAZ-FEP-ERT-MEM | AMC-TZP-CXM-CTX-CAZ-FEP-GEN
Table S4/D- PERMANOVA_antibiogram patterns
Analysis	R_squared	F_statistic	P_Value
Overall Patterns	0.1223	11.7088	0.0001
MDR Patterns Only	0.1332	5.9907	0.0001
Non-MDR Patterns Only	0.1270	6.3259	0.0001
Table S4/C MDR_Status
MDR_Status	Comparison	Jaccard_Index	Expected_Random	P_Value
MDR	Clinical vs Healthy_Individual	0.1176	0.0000	0.0000
MDR	Clinical vs Surface_water	0.0000	0.0000	1.0000
MDR	Healthy_Individual vs Surface_water	0.3636	0.0000	0.0000
Non-MDR	Clinical vs Healthy_Individual	0.1111	0.0000	0.0000
Non-MDR	Clinical vs Surface_water	0.1429	0.0000	0.0000
Non-MDR	Healthy_Individual vs Surface_water	0.1667	0.0000	0.0000
